# Supplementary material for: The Mental Health Impact of the COVID-19 Pandemic on Older Adults in China: A Systematic Review
Source: MDPI journal article supplement (doi:10.3390/ijerph192114362), 2022-11-02
Supplement: s1 [file s1]

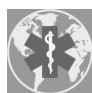

## Supplementary Materials

**Table S1.** JBI Checklist for Assessing Risk of Bias.

| Cross-Sectional Studies |                                                                |                                                              |                                                        |                                                                          |                                      |                                                          |                                                         |                                            |                    |
|-------------------------|----------------------------------------------------------------|--------------------------------------------------------------|--------------------------------------------------------|--------------------------------------------------------------------------|--------------------------------------|----------------------------------------------------------|---------------------------------------------------------|--------------------------------------------|--------------------|
| Study                   | Were the Criteria for Inclusion in the Sample Clearly Defined? | Were the Study Subjects and the Setting Described in Detail? | Was the Exposure Measured in a Valid and Reliable Way? | Were Objective, Standard Criteria Used for Measurement of the Condition? | Were Confounding Factors Identified? | Were Strategies to Deal with Confounding Factors Stated? | Were the Outcomes Measured in a Valid and Reliable Way? | Was Appropriate Statistical Analysis Used? | Overall Appraisal: |
| Zhou, Chen, et al.      | +                                                              | +                                                            | N/A                                                    | N/A                                                                      | +                                    | +                                                        | +                                                       | +                                          | High               |
| Liang, et al.           | +                                                              | +                                                            | N/A                                                    | N/A                                                                      | +                                    | +                                                        | +                                                       | +                                          | High               |
| Chen, Chen & Zhong      | +                                                              | +                                                            | N/A                                                    | N/A                                                                      | +                                    | +                                                        | +                                                       | +                                          | High               |
| Jiang et al., 2021      | +                                                              | +                                                            | N/A                                                    | N/A                                                                      | +                                    | +                                                        | -                                                       | +                                          | Moderate           |
| Liang & Deng., 2022     | -                                                              | +                                                            | N/A                                                    | N/A                                                                      | +                                    | +                                                        | -                                                       | +                                          | Moderate           |
| Sun et al., 2020        | +                                                              | +                                                            | N/A                                                    | N/A                                                                      | +                                    | +                                                        | +                                                       | +                                          | High               |
| Lu et al., 2021         | -                                                              | +                                                            | N/A                                                    | N/A                                                                      | +                                    | +                                                        | +                                                       | +                                          | Moderate           |
| Wang, 2021              | +                                                              | +                                                            | N/A                                                    | N/A                                                                      | +                                    | +                                                        | -                                                       | +                                          | Moderate           |
| Tao et al., 2021        | +                                                              | -                                                            | N/A                                                    | N/A                                                                      | +                                    | +                                                        | +                                                       | +                                          | Moderate           |
| Liu & Liu, 2021         | -                                                              | +                                                            | N/A                                                    | N/A                                                                      | +                                    | -                                                        | -                                                       | +                                          | Low                |
| Bao et al., 2021        | +                                                              | +                                                            | N/A                                                    | N/A                                                                      | +                                    | +                                                        | +                                                       | +                                          | High               |
| Ye & Lin, 2021          | +                                                              | +                                                            | N/A                                                    | N/A                                                                      | +                                    | +                                                        | +                                                       | +                                          | High               |
| Wang et al., 2021       | +                                                              | +                                                            | N/A                                                    | N/A                                                                      | +                                    | +                                                        | +                                                       | +                                          | High               |
| Xu, 2022                | +                                                              | +                                                            | N/A                                                    | +                                                                        | +                                    | +                                                        | +                                                       | +                                          | High               |
| Wang et al., 2021       | +                                                              | +                                                            | N/A                                                    | +                                                                        | +                                    | +                                                        | +                                                       | +                                          | High               |
| Qi et al., 2021         | +                                                              | +                                                            | N/A                                                    | +                                                                        | +                                    | +                                                        | +                                                       | +                                          | High               |

|                  |                                                                     |                                                                                              |                                                        |                                      |                                                          |                                                                                                            |                                                         |                                                                                         |                                                                                                   |                                                          |                                            |                    |          |
|------------------|---------------------------------------------------------------------|----------------------------------------------------------------------------------------------|--------------------------------------------------------|--------------------------------------|----------------------------------------------------------|------------------------------------------------------------------------------------------------------------|---------------------------------------------------------|-----------------------------------------------------------------------------------------|---------------------------------------------------------------------------------------------------|----------------------------------------------------------|--------------------------------------------|--------------------|----------|
|                  |                                                                     |                                                                                              |                                                        |                                      |                                                          |                                                                                                            |                                                         |                                                                                         |                                                                                                   |                                                          |                                            |                    |          |
| Xue et al., 2021 | +                                                                   |                                                                                              | +                                                      |                                      | N/A                                                      |                                                                                                            | +                                                       |                                                                                         | +                                                                                                 |                                                          | +                                          |                    | High     |
| Su et al., 2021  | -                                                                   |                                                                                              | +                                                      |                                      | N/A                                                      |                                                                                                            | +                                                       |                                                                                         | +                                                                                                 |                                                          | +                                          |                    | Moderate |
| Cohort Studies   |                                                                     |                                                                                              |                                                        |                                      |                                                          |                                                                                                            |                                                         |                                                                                         |                                                                                                   |                                                          |                                            |                    |          |
| Study            | Were the two Groups Similar and Recruited from the Same Population? | Were the Exposures Measured Similarly to Assign People to both Exposed and Unexposed Groups? | Was the Exposure Measured in a Valid and Reliable Way? | Were Confounding Factors Identified? | Were Strategies to Deal with Confounding Factors Stated? | Were the Groups/Participants Free of the Outcome at the Start of the Study (or at the Moment of Exposure)? | Were the Outcomes Measured in a Valid and Reliable Way? | Was the Follow up Time Reported and Sufficient to be Long Enough for Outcomes to Occur? | Was Follow up Complete, and if not, Were the Reasons to Loss to Follow up Described and Explored? | Were Strategies to Address Incomplete Follow up Utilized | Was Appropriate Statistical Analysis Used? | Overall Appraisal: |          |
| Li et al.        | N/A                                                                 | N/A                                                                                          | N/A                                                    | +                                    | +                                                        | N/A                                                                                                        | +                                                       | +                                                                                       | +                                                                                                 | N/A                                                      | +                                          | High               |          |

Table S2. MMAT Checklist for Assessing Risk of Bias.

| Category of Study Designs                    |  | Methodological Quality Criteria                                                                                                 | Yes | No | Can't Tell | Comments |
|----------------------------------------------|--|---------------------------------------------------------------------------------------------------------------------------------|-----|----|------------|----------|
| Screening questions (for all types)          |  | S1. Are there clear research questions?                                                                                         | +   |    |            | Moderate |
|                                              |  | S2. Do the collected data allow to address the research questions?                                                              | +   |    |            |          |
|                                              |  | Further appraisal may not be feasible or appropriate when the answer is 'No' or 'Can't tell' to one or both screening questions |     |    |            |          |
| 1. Qualitative                               |  | 1.1 Is the qualitative approach appropriate to answer the research question?                                                    | +   |    |            |          |
|                                              |  | 1.2 Are the qualitative data collection methods adequate to address the research question?                                      | +   |    |            |          |
|                                              |  | 1.3 Are the findings adequately derived from the data?                                                                          |     |    | +          |          |
|                                              |  | 1.4 Is the interpretation of results sufficiently substantiated by data?                                                        |     |    | +          |          |
|                                              |  | 1.5 Is there coherence between qualitative data sources, collection, analysis and interpretation?                               |     |    | +          |          |
| 2. Quantitative randomized controlled trials |  | 2.1 Is randomization appropriately performed?                                                                                   |     |    |            |          |
|                                              |  | 2.2 Are the groups comparable at baseline?                                                                                      |     |    |            |          |
|                                              |  | 2.3 Are there complete outcome data?                                                                                            |     |    |            |          |
|                                              |  | 2.4 Are outcome assessors blinded to the intervention provided?                                                                 |     |    |            |          |
|                                              |  | 2.5 Did the participants adhere to the assigned intervention?                                                                   |     |    |            |          |
| 3. Quantitative nonrandomized                |  | 3.1 Are the participants representative of the target population?                                                               |     | -  |            |          |
|                                              |  | 3.2 Are measurements appropriate regarding both the outcome and intervention (or exposure)?                                     | +   |    |            |          |
|                                              |  | 3.3 Are there complete outcome data?                                                                                            | +   |    |            |          |
|                                              |  | 3.4 Are the confounders accounted for in the design and analysis?                                                               | +   |    |            |          |
|                                              |  | 3.5 During the study period, is the intervention administered (or exposure occurred) as intended?                               | +   |    |            |          |
| 4. Quantitative descriptive                  |  | 4.1 Is the sampling strategy relevant to address the research question?                                                         |     |    |            |          |
|                                              |  | 4.2 Is the sample representative of the target population?                                                                      |     |    |            |          |
|                                              |  | 4.3 Are the measurements appropriate?                                                                                           |     |    |            |          |
|                                              |  | 4.4 Is the risk of nonresponse bias low?                                                                                        |     |    |            |          |
|                                              |  | 4.5 Is the statistical analysis appropriate to answer the research question?                                                    |     |    |            |          |

|    |               |                                                                                                                        |   |
|----|---------------|------------------------------------------------------------------------------------------------------------------------|---|
| 5. | Mixed methods | 5.1 Is there an adequate rationale for using a mixed methods design to address the research question?                  | + |
|    |               | 5.2 Are the different components of the study effectively integrated to answer the research question?                  | + |
|    |               | 5.3 Are the outputs of the integration of qualitative and quantitative components adequately interpreted?              | + |
|    |               | 5.4 Are divergences and inconsistencies between quantitative and qualitative results adequately addressed?             | + |
|    |               | 5.5 Do the different components of the study adhere to the quality criteria of each tradition of the methods involved? | + |
